# Supplementary material for: Photoisomerization pathways of trans-resveratrol
Source: Royal Society of Chemistry journal article supplement (doi:10.1039/d4cp02373k), 2024-01-01
Supplement: d4cp02373k1.pdf [file d4cp02373k1.pdf]

# Supplementary information

## Photoisomerization Pathways of trans-Resveratrol

<sup>1</sup> *Laboratório de Estudos Computacionais em Sistemas Moleculares, eCsMo,  
Departamento de Química, ICEx, Universidade Federal de Minas Gerais, Belo  
Horizonte, Minas Gerais, Brazil*

<sup>2</sup> *Aix Marseille University, CNRS, ICR, Marseille, France*

<sup>3</sup> *Institut Universitaire de France, 75231 Paris, France*

\*[mario.barbatti@univ-amu.fr](mailto:mario.barbatti@univ-amu.fr) ; [wrocha@ufmg.br](mailto:wrocha@ufmg.br)

### Table of Contents

|                                      |   |
|--------------------------------------|---|
| S1. MRCI/ODM2 calculations .....     | 2 |
| S2. CASSCF/CASPT2 calculations ..... | 2 |
| S3. Cartesian coordinates .....      | 6 |

## S1. MRCI/ODM2 calculations

**Table S1.** Distribution of classified hopping structures.

| Hopping type          | Window A | Window B |
|-----------------------|----------|----------|
| cys-pyramidalized     | 4        | 1        |
| Cyclic                | 5        | 24       |
| Twisted-pyramidalized | 43       | 28       |
| HOOP                  | 27       | 28       |
| H dissociated         | 9        | 10       |
| No hopping            | 12       | 9        |
| Total of trajectories | 100      | 100      |

## S2. CASSCF/CASPT2 calculations

Analyzing the natural orbitals and their occupation considered in the 14,14 active space (Figure S2), we concluded that the orbitals  $\pi_6$ ,  $\pi_7$ ,  $\pi_6^*$ , and  $\pi_7^*$  could be excluded without compromising the system's description. Therefore, the (10,10) active space (Figure S1) was chosen to proceed with the calculations.

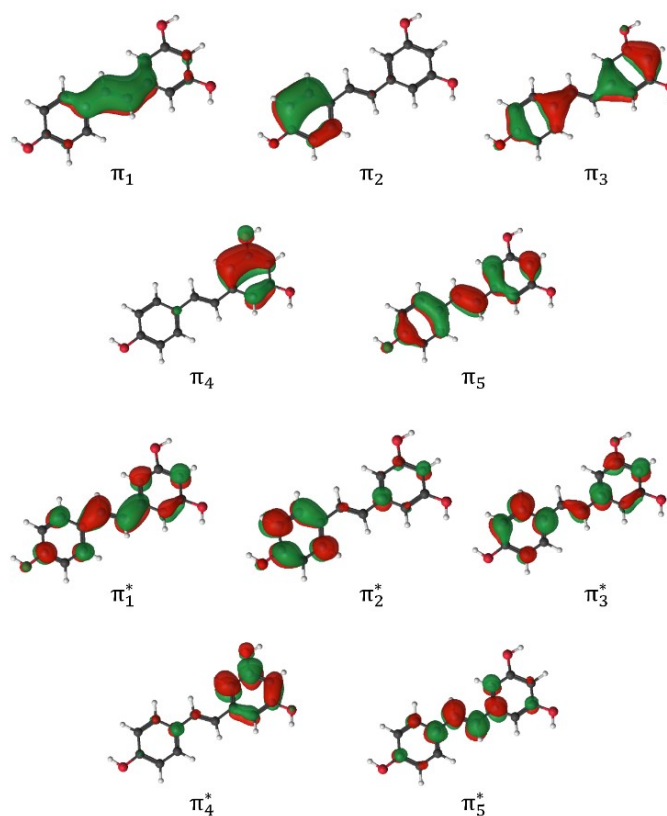

**Figure S1.** Orbitals used in the active space for CASSCF(10,10) calculations.

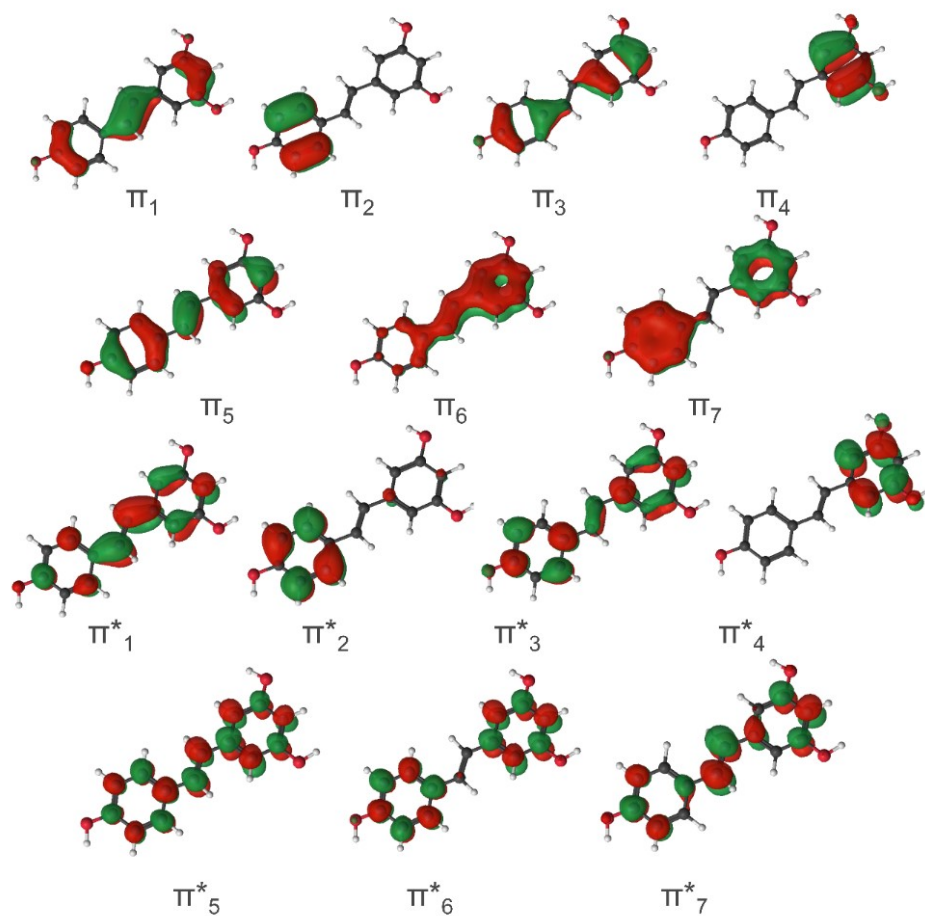

**Figure S2.** Orbitals used in the active space for CASSCF(14,14) calculations.

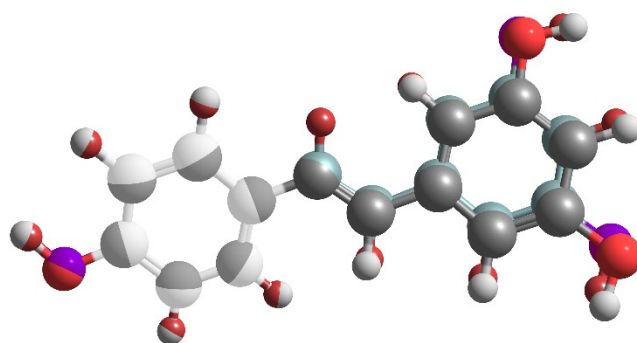

**Figure S3.** Overlay of the ground state structures of trans-resveratrol optimized at the CASSCF(10,10) and MRCI/ODM3 levels.

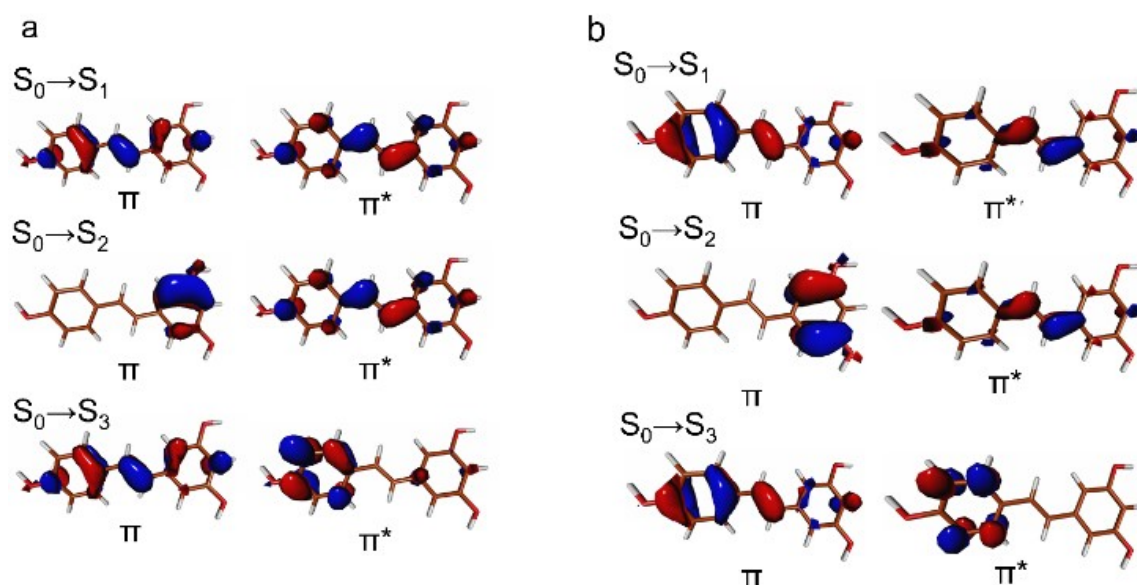

**Figure S4.** Natural orbitals involved in the main transitions  $S_0 \rightarrow S_1$ ,  $S_0 \rightarrow S_2$ , and  $S_0 \rightarrow S_3$  of *trans*-resveratrol computed with (a) SA-CASSCF and (b) MRCI/ODM3.

**Table S2.** Vertical excitation energies and oscillator strength ( $f$ ) for *trans*-resveratrol at XMS-CASPT2//CASSCF level.

| $S_0$<br>Geom | ANO-S-VDZ      |       |                |       | ANO-RCC-VDZP      |                    |                |       |
|---------------|----------------|-------|----------------|-------|-------------------|--------------------|----------------|-------|
|               | IPEA 0.00      |       | IPEA 0.25      |       | IPEA 0.00         |                    | IPEA 0.25      |       |
|               | Energy<br>(eV) | $f$   | Energy<br>(eV) | $f$   | Energy (eV)       | $f$                | Energy<br>(eV) | $f$   |
| $S_1$         | 3.94           | 0.948 | 4.46           | 1.074 | 4.10              | 0.986              | 4.60           | 1.11  |
|               |                |       |                |       | 4.24 <sup>a</sup> | 0.445 <sup>a</sup> |                |       |
| $S_2$         | 4.59           | 0.010 | 5.10           | 0.017 | 4.73              | 0.009              | 5.25           | 0.01  |
|               |                |       |                |       | 4.52 <sup>a</sup> | 0.196 <sup>a</sup> |                |       |
| $S_3$         | 4.72           | 0.012 | 5.36           | 0.007 | 4.90              | 0.008              | 5.53           | 0.004 |
|               |                |       |                |       | 5.79 <sup>a</sup> | 0.002 <sup>a</sup> |                |       |

<sup>a</sup>Computational results obtained using active space XMS-CASPT2(12,10)//CASSCF (12,10).

**Table S3.** Intersystem crossing rates involving the  $S_1 \rightarrow T_1$  transition for *trans* and *cis*-resveratrol, computed at the CAM-B3LYP/def2-TZVP level in the gas phase

|                                | <i>trans</i> -resveratrol | <i>cis</i> -resveratrol |
|--------------------------------|---------------------------|-------------------------|
| ISC rate constant ( $s^{-1}$ ) | 95.7                      | $5.55 \cdot 10^5$       |
| Time (s)                       | 0.01                      | $1.80 \cdot 10^{-6}$    |

Values were obtained using the path integral formalism as implemented in Orca program [70] of the main text.

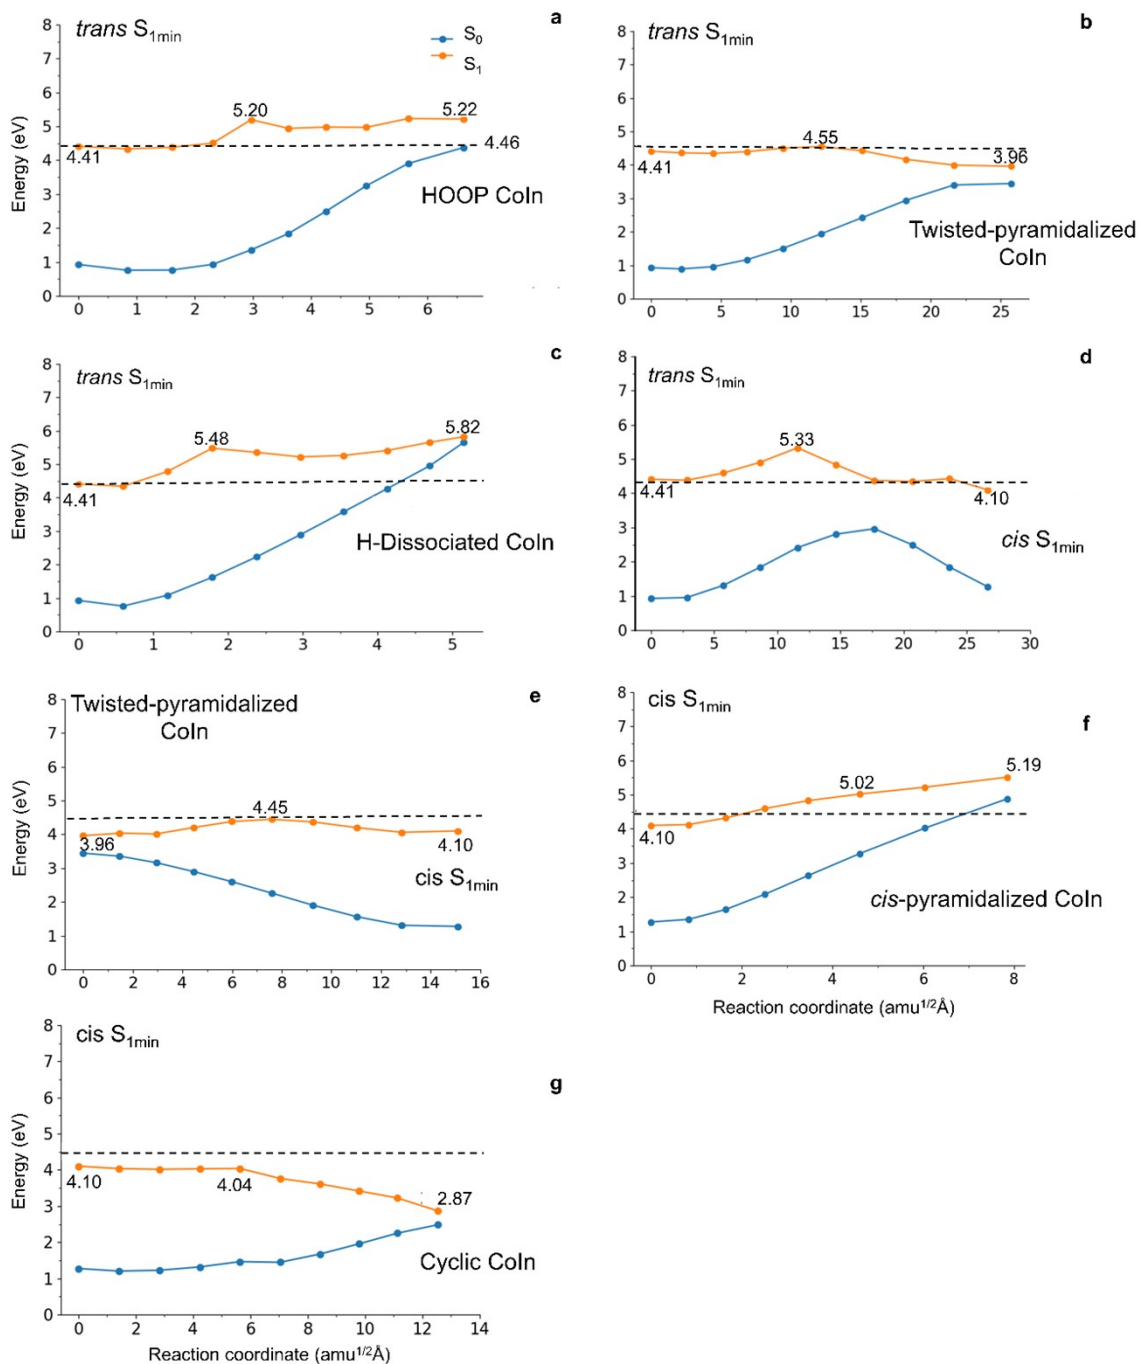

**Figure S5.** Energy profiles between the *trans*-S<sub>1</sub> minimum and the (a) HOOP conical intersection, (b) twisted-pyramidalized conical intersection, (c) H-dissociated conical intersection, (d) *cis*-S<sub>1</sub> minimum. Energy profiles between (e) twisted-pyramidalized conical intersection and *cis*-S<sub>1</sub> minimum, (f) *cis*-S<sub>1</sub> minimum and *cis*-pyramidalized conical intersection, (g) *cis*-S<sub>1</sub> minimum and cyclic conical intersection. All energy profiles were done with XMS-CASPT2 on CASSCF energies using ANO-S-VDZP basis set, which explains the non-null energy gaps at the conical intersections.

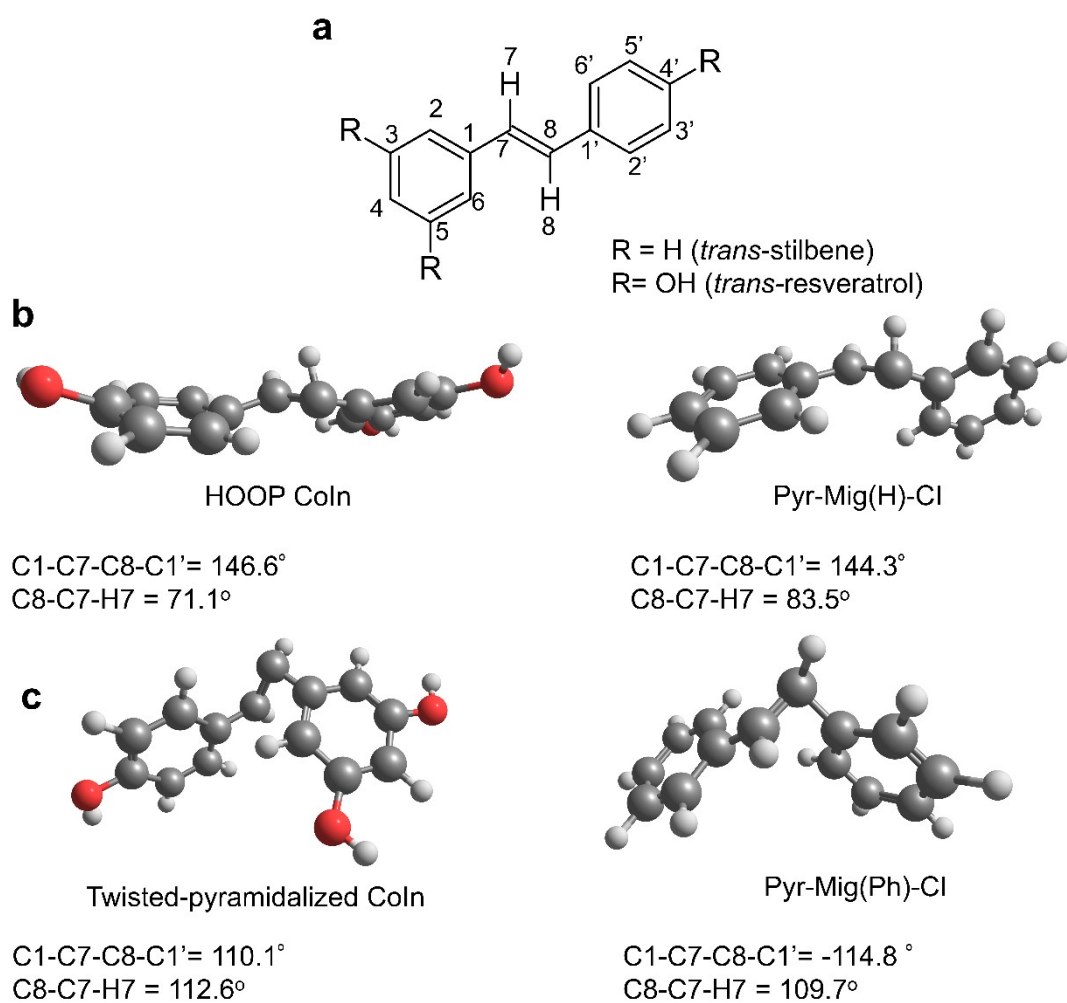

**Figure S6.** a) *trans*-stilbene/resveratrol structures. Comparison between the avoided regions observed in the present work (left) and in studies conducted by Wier *et al.* [27] (right) b) HOOP CoIn structure and the Pyr-Mig(H)-CI analog; c) Twisted-pyramidalized CoIn and the Pyr-Mig(Ph)CI analog.

### S3. Cartesian coordinates

Cartesian coordinates in angstroms of the geometries optimized in the gas phase at the CASSCF (10,10) level.

*trans*-S<sub>0</sub>min

Energy (SA-CASSCF): -761.95686037

Energy (XMS-CASPT2): -764.23355123

|   |              |              |              |
|---|--------------|--------------|--------------|
| O | -2.649287440 | 5.053426780  | -3.126987040 |
| H | -3.430451960 | 5.481289160  | -2.810608530 |
| C | 0.069679000  | -0.010540590 | 0.035369210  |
| H | 0.625134870  | 0.040280280  | -0.888916310 |
| C | -0.927444440 | 0.873981880  | 0.251973500  |
| H | -1.501458460 | 0.793675440  | 1.163032490  |
| C | -1.355197470 | 1.962281430  | -0.642918040 |
| C | -0.676651660 | 2.317502580  | -1.824635460 |
| H | 0.217791270  | 1.788214680  | -2.112859050 |
| H | -0.585510190 | 3.601207220  | -3.533831090 |
| C | -1.118537260 | 3.338309850  | -2.630882180 |
| C | -2.266585220 | 4.059783270  | -2.291501230 |
| C | -2.958852420 | 3.740175320  | -1.127304770 |
| C | -2.499291500 | 2.699150810  | -0.313650860 |
| H | -3.045543270 | 2.460690640  | 0.588098130  |
| C | 1.787632850  | -3.115787420 | 1.239249040  |
| C | 1.368984580  | -2.071159540 | 0.440937840  |
| C | 1.352777430  | -3.223075630 | 2.554222130  |
| H | 1.716318980  | -2.003108930 | -0.580431480 |
| H | 1.695737970  | -4.046949040 | 3.163630710  |
| C | 0.486581020  | -1.096511860 | 0.943274790  |
| C | 0.487241600  | -2.257012900 | 3.057595770  |
| O | 0.033862950  | -2.300451180 | 4.334304440  |
| C | 0.052436950  | -1.195264440 | 2.266576420  |
| H | -0.603907730 | -0.463348140 | 2.705923210  |
| O | 2.630350460  | -4.076392270 | 0.795940550  |
| H | 2.868945420  | -3.925584950 | -0.106167560 |
| H | 0.389060880  | -3.045201330 | 4.795035410  |
| H | -3.846982210 | 4.292925890  | -0.851314040 |

*cis*-S<sub>0</sub>min

Energy (SA-CASSCF): -761.95133193

Energy (XMS-CASPT2): -764.23311640

|   |             |             |             |
|---|-------------|-------------|-------------|
| O | -1.00994929 | 5.05615263  | -1.04423036 |
| H | -0.08491597 | 5.23837840  | -1.11071720 |
| C | -1.64933969 | -1.51128525 | -0.54507220 |
| H | -2.05904698 | -2.48670718 | -0.77490642 |
| C | -2.23486187 | -0.45476208 | -1.15261421 |
| H | -3.10197237 | -0.67768968 | -1.76254486 |
| C | -1.85749979 | 0.97781957  | -1.11227348 |

|   |             |             |             |
|---|-------------|-------------|-------------|
| C | -0.53134563 | 1.41696425  | -1.18770141 |
| H | 0.26989380  | 0.69971500  | -1.26101512 |
| H | 0.80777013  | 3.10123427  | -1.22753616 |
| C | -0.22353800 | 2.77992386  | -1.16608062 |
| C | -1.24573225 | 3.72298685  | -1.07262085 |
| C | -2.57248134 | 3.30010628  | -1.01455114 |
| C | -2.86601503 | 1.95367672  | -1.04444337 |
| H | -3.90106851 | 1.64119743  | -1.00783597 |
| C | 1.52167668  | -2.58223240 | 1.17783574  |
| C | 0.44854053  | -2.53769945 | 0.28588183  |
| C | 1.64104408  | -1.64178589 | 2.19339533  |
| H | 0.37503378  | -3.28730865 | -0.48794036 |
| H | 2.46352051  | -1.66862214 | 2.89399331  |
| C | -0.50701023 | -1.52919334 | 0.40334642  |
| C | 0.66984735  | -0.65280679 | 2.31648500  |
| O | 0.82663761  | 0.22756101  | 3.33096187  |
| C | -0.39467427 | -0.58827322 | 1.44200965  |
| H | -1.13836513 | 0.18395052  | 1.55342049  |
| O | 2.42748358  | -3.57535807 | 1.00755851  |
| H | 3.10321710  | -3.53428936 | 1.66704330  |
| H | 0.13185147  | 0.86887673  | 3.32896498  |
| H | -3.35784186 | 4.04029291  | -0.95334206 |

ring-closed  $S_0$ min

Energy (SA-CASSCF): -761.89858320

Energy (XMS-CASPT2): -764.19057183

|   |              |              |              |
|---|--------------|--------------|--------------|
| O | -0.930037340 | 4.618759960  | -0.100688920 |
| H | -0.044557540 | 4.745446520  | 0.207121830  |
| C | -1.578363360 | -1.756857820 | -0.664632920 |
| H | -1.772242080 | -2.725598970 | -1.104709160 |
| C | -2.490317700 | -0.645985300 | -0.953363860 |
| H | -3.488713430 | -0.851903870 | -1.313322630 |
| C | -2.064223960 | 0.639096890  | -0.798443360 |
| C | -0.615538370 | 0.859195620  | -0.350140770 |
| H | 0.025613960  | 0.594864180  | -1.202061650 |
| H | 0.677587650  | 2.557212490  | 0.301611280  |
| C | -0.322027340 | 2.309313440  | -0.016900330 |
| C | -1.194034820 | 3.300320130  | -0.287603330 |
| C | -2.527371610 | 3.049028390  | -0.833341010 |
| C | -2.923702230 | 1.773926360  | -1.079232340 |
| H | -3.913418770 | 1.575881760  | -1.466678070 |
| C | 1.587073340  | -2.390429620 | 1.047403180  |
| C | 0.443759770  | -2.639519250 | 0.371549420  |
| C | 1.867629020  | -1.081155480 | 1.630288740  |
| H | 0.245292630  | -3.614018360 | -0.051436490 |
| H | 2.752879310  | -0.961614820 | 2.236380620  |
| C | -0.519308010 | -1.571698090 | 0.118654680  |
| C | 0.997856350  | -0.065039940 | 1.485619680  |
| O | 1.255227480  | 1.099407720  | 2.139807780  |



|   |              |              |              |
|---|--------------|--------------|--------------|
| C | -0.322781460 | -0.184023760 | 0.750147040  |
| H | -1.102199120 | -0.068125820 | 1.518170030  |
| O | 2.557149550  | -3.305042390 | 1.281585030  |
| H | 2.332822220  | -4.140151450 | 0.898354900  |
| H | 0.455863820  | 1.571601280  | 2.313214360  |
| H | -3.166791840 | 3.897174090  | -1.026358060 |

*trans*-S<sub>1</sub>min

Energy (SA-CASSCF): -761.79192724

Energy (XMS-CASPT2): -764.071498

|   |              |              |              |
|---|--------------|--------------|--------------|
| O | -2.662513000 | 5.018527000  | -3.130112000 |
| H | -3.336989000 | 5.561351000  | -2.750245000 |
| C | 0.071281000  | -0.073704000 | -0.017443000 |
| H | 0.566248000  | -0.039258000 | -0.972928000 |
| C | -0.947775000 | 0.928169000  | 0.261172000  |
| H | -1.430854000 | 0.887252000  | 1.223553000  |
| C | -1.368259000 | 1.942065000  | -0.588056000 |
| C | -0.816215000 | 2.149239000  | -1.948144000 |
| H | -0.049022000 | 1.486476000  | -2.310830000 |
| H | -0.845606000 | 3.286655000  | -3.725020000 |
| C | -1.249703000 | 3.137276000  | -2.733024000 |
| C | -2.279427000 | 4.044131000  | -2.275320000 |
| C | -2.839511000 | 3.880660000  | -0.971748000 |
| C | -2.399032000 | 2.870543000  | -0.164033000 |
| H | -2.824731000 | 2.750463000  | 0.822064000  |
| C | 1.925075000  | -3.007803000 | 1.233632000  |
| C | 1.517843000  | -2.028311000 | 0.432110000  |
| C | 1.354696000  | -3.197184000 | 2.568844000  |
| H | 1.952909000  | -1.906889000 | -0.549986000 |
| H | 1.715043000  | -4.004331000 | 3.185810000  |
| C | 0.467073000  | -1.084041000 | 0.854378000  |
| C | 0.343023000  | -2.302461000 | 2.997339000  |
| O | -0.219577000 | -2.434098000 | 4.226359000  |
| C | -0.100474000 | -1.277566000 | 2.190059000  |
| H | -0.870462000 | -0.627863000 | 2.565070000  |
| O | 2.876001000  | -3.916187000 | 0.936249000  |
| H | 3.223328000  | -3.767023000 | 0.068523000  |
| H | 0.153313000  | -3.164375000 | 4.695290000  |
| H | -3.608845000 | 4.560795000  | -0.630407000 |

*cis*-S<sub>1</sub>min

Energy (SA-CASSCF): -761.78254296

Energy (XMS-CASPT2): -764.08283114

|   |              |              |              |
|---|--------------|--------------|--------------|
| O | -1.247525000 | 5.152129000  | -1.254782000 |
| H | -0.330654000 | 5.381480000  | -1.284025000 |
| C | -1.367106000 | -1.439352000 | -0.666085000 |
| H | -1.559156000 | -2.325362000 | -1.258001000 |
| C | -2.278578000 | -0.325606000 | -0.881449000 |

|   |              |              |              |
|---|--------------|--------------|--------------|
| H | -3.317845000 | -0.590564000 | -1.038448000 |
| C | -1.963803000 | 1.031639000  | -0.994729000 |
| C | -0.604765000 | 1.535857000  | -1.048837000 |
| H | 0.215379000  | 0.840487000  | -1.047759000 |
| H | 0.668727000  | 3.253831000  | -1.181980000 |
| C | -0.352119000 | 2.897670000  | -1.135988000 |
| C | -1.413430000 | 3.811749000  | -1.182839000 |
| C | -2.778229000 | 3.335649000  | -1.168297000 |
| C | -3.033877000 | 2.023100000  | -1.088877000 |
| H | -4.056382000 | 1.672170000  | -1.079371000 |
| C | 1.501737000  | -2.830215000 | 1.247054000  |
| C | 0.497067000  | -2.716108000 | 0.322671000  |
| C | 1.727498000  | -1.809378000 | 2.228387000  |
| H | 0.357403000  | -3.495390000 | -0.410616000 |
| H | 2.527378000  | -1.869393000 | 2.948443000  |
| C | -0.358590000 | -1.542029000 | 0.297041000  |
| C | 0.836578000  | -0.664743000 | 2.240928000  |
| O | 1.099499000  | 0.207957000  | 3.235820000  |
| C | -0.143613000 | -0.524626000 | 1.347433000  |
| H | -0.807209000 | 0.320641000  | 1.398852000  |
| O | 2.298432000  | -3.928167000 | 1.216892000  |
| H | 2.908058000  | -3.927155000 | 1.938264000  |
| H | 0.500300000  | 0.939986000  | 3.204050000  |
| H | -3.574318000 | 4.064564000  | -1.228281000 |

*cis*-pyramidalized CoIn

Energy (SA-CASSCF): -761.60600233

Energy (XMS-CASPT2):-764.0428195

|   |              |              |              |
|---|--------------|--------------|--------------|
| O | -0.451242000 | 4.491294000  | -0.614882000 |
| H | -1.084320000 | 5.196024000  | -0.748985000 |
| C | -1.888780000 | -2.072241000 | -0.376228000 |
| H | -1.425306000 | -2.253065000 | -1.536010000 |
| C | -2.246249000 | -0.712333000 | -0.641936000 |
| H | -3.262709000 | -0.347114000 | -0.192088000 |
| C | -1.792831000 | 0.663506000  | -1.057051000 |
| C | -0.394931000 | 0.978857000  | -1.140634000 |
| H | 0.221220000  | 0.094243000  | -1.244197000 |
| H | 0.971369000  | 2.382563000  | -0.341924000 |
| C | 0.065663000  | 2.236116000  | -0.851333000 |
| C | -0.891924000 | 3.274400000  | -0.895324000 |
| C | -2.243097000 | 3.016328000  | -0.882481000 |
| C | -2.733597000 | 1.691680000  | -1.017629000 |
| H | -3.760477000 | 1.415574000  | -0.946256000 |
| C | 1.582486000  | -2.032991000 | 0.901868000  |
| C | 0.577467000  | -1.985495000 | -0.076773000 |
| C | 1.536638000  | -1.092824000 | 1.888693000  |
| H | 0.645290000  | -2.630492000 | -0.926443000 |
| H | 2.506209000  | -0.953326000 | 2.311080000  |
| C | -0.741416000 | -1.485059000 | 0.334239000  |
| C | 0.316067000  | -0.534558000 | 2.334362000  |

|   |              |              |              |
|---|--------------|--------------|--------------|
| O | 0.165234000  | 0.299377000  | 3.371176000  |
| C | -0.775397000 | -0.605575000 | 1.447009000  |
| H | -1.605316000 | 0.024416000  | 1.655300000  |
| O | 2.782544000  | -2.627358000 | 0.608826000  |
| H | 2.691453000  | -3.201321000 | -0.153065000 |
| H | 0.869649000  | 0.137728000  | 3.988055000  |
| H | -2.901333000 | 3.897552000  | -1.015955000 |

#### Cyclic CoIn

Energy (SA-CASSCF): -761.78898581

Energy (XMS-CASPT2):-764.1281293

|   |              |              |              |
|---|--------------|--------------|--------------|
| O | -0.650999757 | 4.564541560  | -0.323038424 |
| H | 0.286546468  | 4.645018625  | -0.220169518 |
| C | -1.538727843 | -1.670924654 | -0.804941430 |
| H | -1.793805381 | -2.669401194 | -1.122281804 |
| C | -2.358986536 | -0.578076444 | -1.172278434 |
| H | -3.370681005 | -0.773354686 | -1.522039398 |
| C | -1.952694716 | 0.726081856  | -1.085514664 |
| C | -0.559328703 | 0.908519598  | -0.736102637 |
| H | 0.133798687  | 0.262069205  | -1.264366289 |
| H | 0.942090594  | 2.474780160  | -0.361585426 |
| C | -0.111927469 | 2.271486204  | -0.478138479 |
| C | -1.018578641 | 3.284988797  | -0.480016390 |
| C | -2.441660719 | 3.095284148  | -0.681890776 |
| C | -2.863447460 | 1.853308723  | -0.999386390 |
| H | -3.913199442 | 1.667057611  | -1.184943129 |
| C | 1.543900466  | -2.100595034 | 1.190788854  |
| C | 0.325096417  | -2.503908223 | 0.615682883  |
| C | 1.874475661  | -0.812089660 | 1.613324485  |
| H | 0.244816558  | -3.514161251 | 0.241875221  |
| H | 2.810061772  | -0.592554620 | 2.095748562  |
| C | -0.562454905 | -1.506124757 | 0.183056528  |
| C | 0.781696194  | 0.035980974  | 1.629156800  |
| O | 0.864634832  | 1.144410191  | 2.331770208  |
| C | -0.401731512 | -0.227215625 | 0.898564977  |
| H | -1.305387567 | 0.155299700  | 1.346593341  |
| O | 2.493145944  | -2.998884191 | 1.340853823  |
| H | 2.203894796  | -3.856689234 | 1.060932236  |
| H | 0.097867586  | 1.687169709  | 2.204241690  |
| H | -3.088370426 | 3.956898453  | -0.643045435 |

#### HOOP CoIn

Energy (SA-CASSCF): -761.70668035

Energy (XMS-CASPT2):-764.0418625

|   |              |              |              |
|---|--------------|--------------|--------------|
| O | -3.106045927 | 4.958108318  | -3.350598866 |
| H | -3.723674927 | 5.559900318  | -2.955849866 |
| C | -0.772494927 | -0.230095682 | -0.744007866 |
| H | -1.916348927 | -0.530668682 | -0.851164866 |

|   |              |              |              |
|---|--------------|--------------|--------------|
| C | -1.542820927 | 0.798390318  | -0.291882866 |
| H | -2.310351927 | 0.719475318  | 0.513705134  |
| C | -1.573064927 | 2.178936318  | -0.803270866 |
| C | -0.930190927 | 2.432659318  | -2.020238866 |
| H | -0.300375927 | 1.631110318  | -2.379875866 |
| H | -0.969067927 | 3.602865318  | -3.849274866 |
| C | -1.404373927 | 3.426752318  | -2.876928866 |
| C | -2.451637927 | 4.209512318  | -2.442224866 |
| C | -2.919583927 | 4.161193318  | -1.103962866 |
| C | -2.520535927 | 3.114833318  | -0.291541866 |
| H | -2.752848927 | 3.033706318  | 0.755427134  |
| C | 0.371445073  | -3.519470682 | 0.584044134  |
| C | 0.199629073  | -2.440190682 | -0.290002866 |
| C | 0.414476073  | -3.360769682 | 1.946957134  |
| H | 0.185467073  | -2.590723682 | -1.351160866 |
| H | 0.799874073  | -4.091484682 | 2.638339134  |
| C | -0.299743927 | -1.233210682 | 0.237474134  |
| C | 0.097971073  | -2.098128682 | 2.472172134  |
| O | 0.076507073  | -1.882599682 | 3.809938134  |
| C | -0.249963927 | -1.046770682 | 1.625807134  |
| H | -0.539610927 | -0.147408682 | 2.147377134  |
| O | 0.775000073  | -4.735138682 | 0.093931134  |
| H | 0.364494073  | -4.874757682 | -0.745586866 |
| H | 0.583369073  | -2.577807682 | 4.205780134  |
| H | -3.697985927 | 4.873952318  | -0.864159866 |

twisted-pyramidalized CoIn

Energy (SA-CASSCF): -761.7715369

Energy (XMS-CASPT2): -764.0880137

|   |              |              |              |
|---|--------------|--------------|--------------|
| O | -2.664231000 | 5.014006000  | -3.103265000 |
| H | -3.327987000 | 5.553266000  | -2.700449000 |
| C | 0.107602000  | -0.110416000 | -0.068457000 |
| H | -0.162739000 | -1.123608000 | 0.211542000  |
| C | -0.943329000 | 0.852414000  | 0.228566000  |
| H | -1.632961000 | 0.633405000  | 1.043329000  |
| C | -1.370605000 | 1.965632000  | -0.612134000 |
| C | -0.837263000 | 2.139800000  | -1.897690000 |
| H | -0.075128000 | 1.456218000  | -2.233293000 |
| H | -0.876727000 | 3.301949000  | -3.713192000 |
| C | -1.284437000 | 3.167501000  | -2.721541000 |
| C | -2.263140000 | 4.030441000  | -2.276142000 |
| C | -2.821358000 | 3.873638000  | -0.995791000 |
| C | -2.375344000 | 2.846903000  | -0.177026000 |
| H | -2.799042000 | 2.729605000  | 0.810448000  |
| C | 1.882884000  | 0.381838000  | 3.173480000  |
| C | 1.328125000  | -0.251574000 | 2.134248000  |
| C | 2.011849000  | 1.836989000  | 3.240728000  |
| H | 1.216291000  | -1.326239000 | 2.139152000  |
| H | 2.452774000  | 2.280735000  | 4.119253000  |

|   |              |              |              |
|---|--------------|--------------|--------------|
| C | 0.871750000  | 0.490137000  | 0.954930000  |
| C | 1.595072000  | 2.563660000  | 2.158386000  |
| O | 1.697149000  | 3.913717000  | 2.094368000  |
| C | 1.066555000  | 1.937543000  | 0.997901000  |
| H | 0.964317000  | 2.532627000  | 0.114713000  |
| O | 2.348282000  | -0.232674000 | 4.270643000  |
| H | 2.256945000  | -1.172091000 | 4.194139000  |
| H | 2.128963000  | 4.255745000  | 2.862567000  |
| H | -3.594153000 | 4.550183000  | -0.657091000 |

H-dissociated CoIn

Energy (SA-CASSCF): -761.7302159

Energy (XMS-CASPT2):-764.0196151

|   |              |              |              |
|---|--------------|--------------|--------------|
| O | -2.841838000 | 4.913198000  | -3.101240000 |
| H | -4.354405000 | 5.453427000  | -2.031236000 |
| C | -0.109455000 | -0.113974000 | 0.008106000  |
| H | 0.111277000  | -0.216794000 | -1.067037000 |
| C | -0.916346000 | 0.884271000  | 0.426623000  |
| H | -1.519635000 | 0.906946000  | 1.323556000  |
| C | -1.358833000 | 1.984642000  | -0.587679000 |
| C | -0.914891000 | 2.139353000  | -1.914234000 |
| H | -0.492649000 | 1.212303000  | -2.349217000 |
| H | -0.735053000 | 3.184880000  | -3.697707000 |
| C | -1.240013000 | 3.203351000  | -2.729976000 |
| C | -2.254877000 | 4.025865000  | -2.300183000 |
| C | -2.812449000 | 3.837162000  | -1.014601000 |
| C | -2.371084000 | 2.833543000  | -0.133653000 |
| H | -2.725804000 | 2.855930000  | 0.859715000  |
| C | 1.763938000  | -3.194103000 | 1.185668000  |
| C | 1.072874000  | -2.257452000 | 0.430081000  |
| C | 1.854083000  | -2.944034000 | 2.577838000  |
| H | 1.256677000  | -2.398976000 | -0.700151000 |
| H | 2.498162000  | -3.466056000 | 3.260372000  |
| C | 0.414558000  | -1.157042000 | 0.941652000  |
| C | 0.958812000  | -1.978497000 | 3.122028000  |
| O | 1.097727000  | -1.578245000 | 4.432040000  |
| C | 0.228887000  | -1.094390000 | 2.307956000  |
| H | -0.252911000 | -0.221872000 | 2.770236000  |
| O | 2.593513000  | -4.064037000 | 0.621160000  |
| H | 3.376589000  | -3.574396000 | 0.264150000  |
| H | 1.854522000  | -2.041447000 | 4.708488000  |
| H | -3.668647000 | 4.373030000  | -0.723299000 |
